# Supplementary material
Source: PubMed Central journal article supplement (PMC8792350)
Supplement: NIHMS1760106-supplement-9.pdf [file NIHMS1760106-supplement-9.pdf]

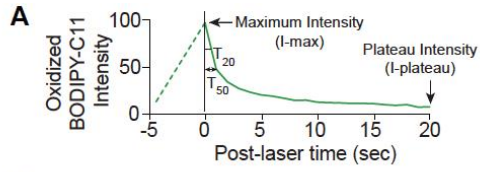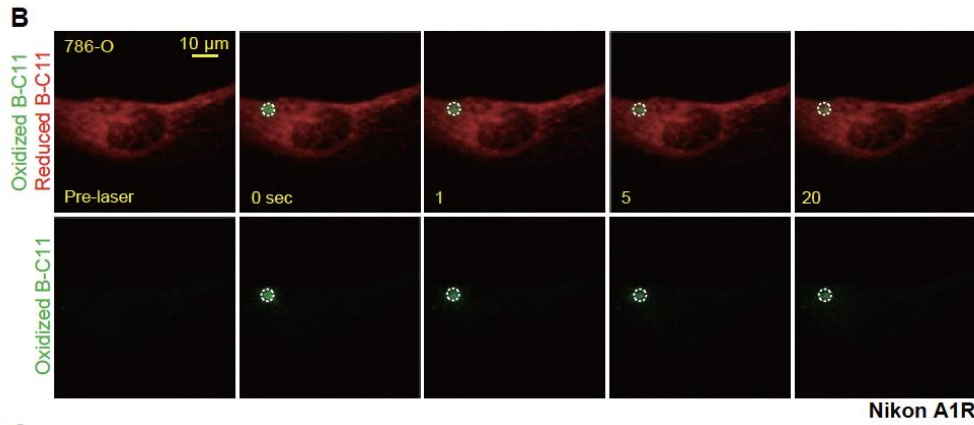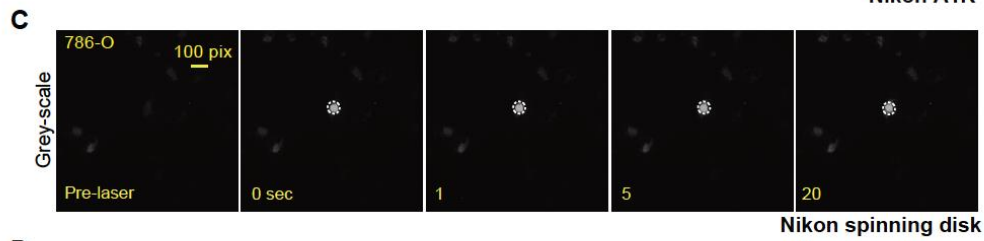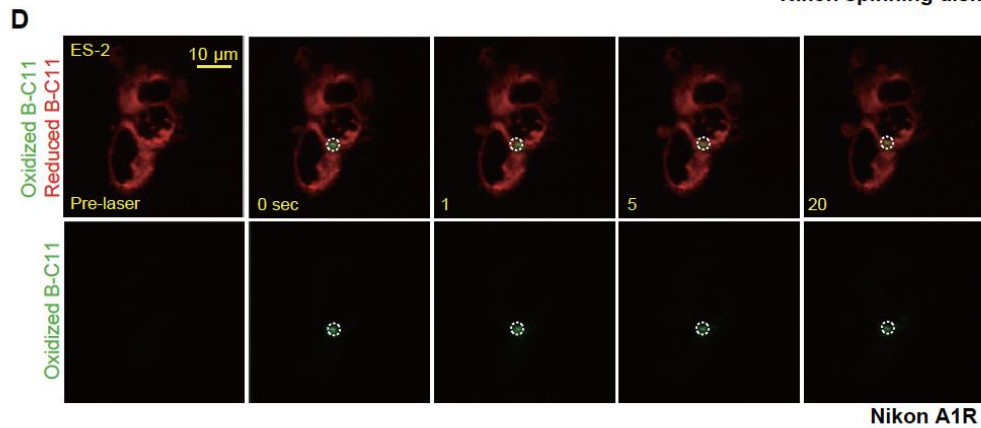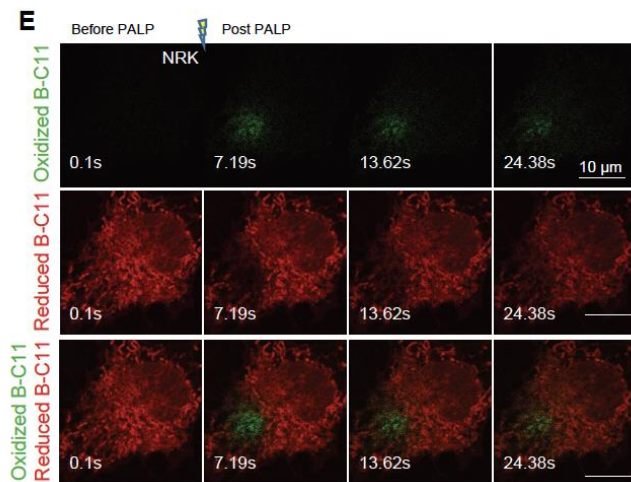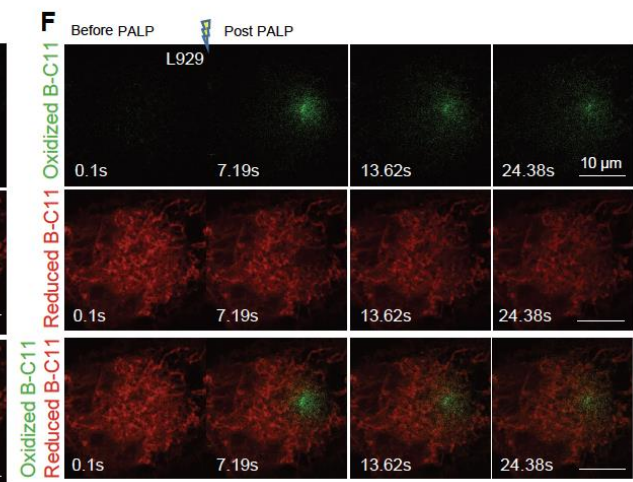

**Supplementary Figure 1. Targeted laser pulses induce localized lipid peroxidation in live cancer cells (related to Figure 1).** Green, oxidized BODIPY-C11 signal; red, reduced BODIPY-C11 signal.

**A.** Schematic diagram showing the parameters used to describe the dynamics of lipid peroxidation signal in a representative PALPv1 experiment. All oxidized BODIPY-C11 signals are normalized by deducing the pre-laser intensity from the detected signals. I-max, normalized maximal intensity,  $T_{20}$ , time (sec) it takes to reach 20% reduction from I-max signal.  $T_{50}$ , time (sec) it takes to reach 50% reduction from I-max signal. I-plateau, normalized signal intensity when the oxBODIPY-C11 signal largely plateaued.

**B.** Representative fluorescent images showing the reduced and oxidized BODIPY-C11 signal before and after the application of 405 nm laser pulses in 786-O cells acquired on a Nikon A1R HD25 confocal microscope. Scale bar indicates 10  $\mu\text{m}$ .

**C.** Representative fluorescent images showing the oxidized BODIPY-C11 signal before and after the application of 405 nm laser pulses PALP signals in 786-O cells acquired on a Nikon spinning disk confocal CSU-W1 system. Scale bar indicates 100 pix.

**D.** Representative fluorescent images showing the reduced and oxidized BODIPY-C11 signal before and after the application of 405 nm laser pulses in ES-2 cells acquired on a Nikon A1R HD25 confocal microscope. Scale bar indicates 10  $\mu\text{m}$ .

**E.** Representative fluorescent images showing the reduced and oxidized BODIPY-C11 signal before and after the application of 405 nm laser pulses in rat NRK cells acquired on a Nikon A1 N-SIM STORM confocal microscope. This experiment was performed twice.

**F.** Representative fluorescent images showing the reduced and oxidized BODIPY-C11 signal before and after the application of 405 nm laser pulses in mouse L929 cells acquired on a Nikon A1 N-SIM STORM confocal microscope. This experiment was performed twice.

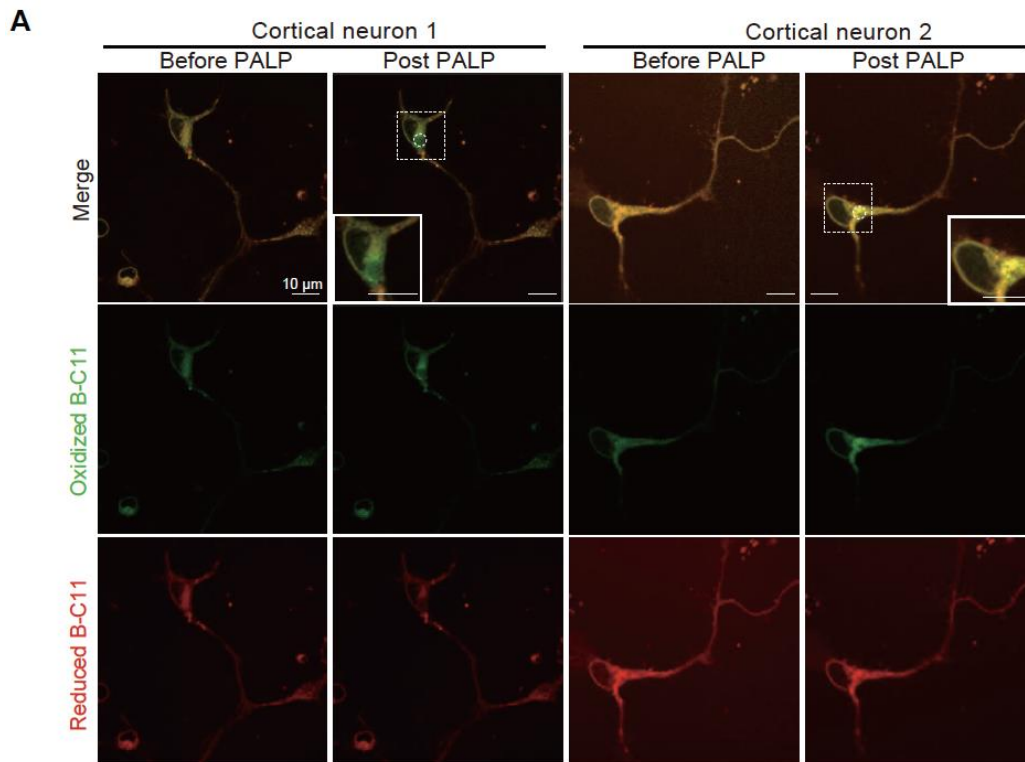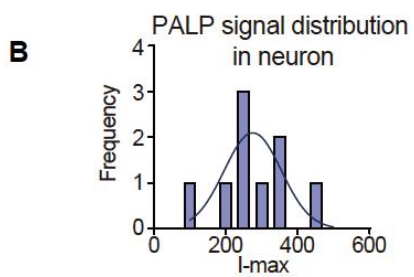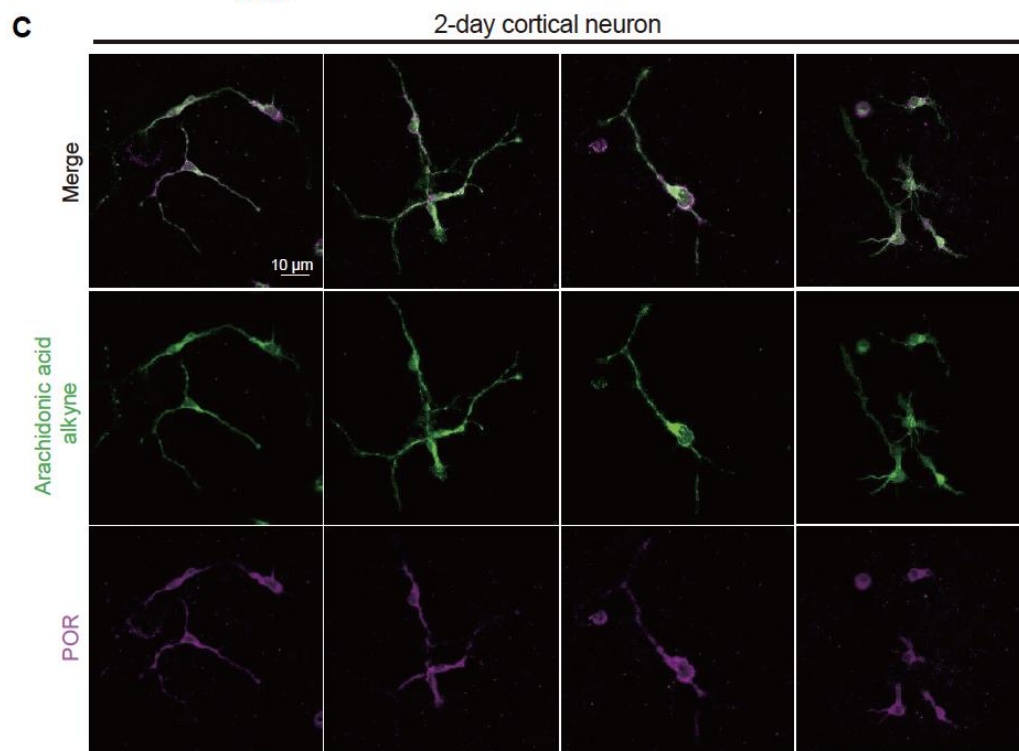

**Supplementary Figure 2. Targeted laser pulses induce localized lipid peroxidation in primary mouse cortical neurons (related to Figure 1).**

**A.** Representative fluorescent images showing the reduced and oxidized BODIPY-C11 signal before and after the application of 405 nm laser pulses in primary mouse neurons in culture (two additional cells from the same experiment as in **Figure 1C**). Green, oxidized BODIPY-C11 signal; red, reduced BODIPY-C11 signal. Scale bar indicates 10  $\mu\text{m}$ .

**B.** Frequency distribution of the I-max signal intensity in 9 neurons analyzed by PALPv1. Gaussian nonlinear regression used to generate the fit curve.

**C.** Representative fluorescent images showing the localization of POR protein, used as an endoplasmic reticulum tracker, and exogenously added polyunsaturated fatty acid-alkyne in neurons. Cells were incubated with 5  $\mu\text{M}$  arachidonic acid-alkyne for 18 hours prior to fixation. Green, arachidonic acid-alkyne signal; violet, POR signal. Scale bar indicates 10  $\mu\text{m}$ . This experiment was performed once.

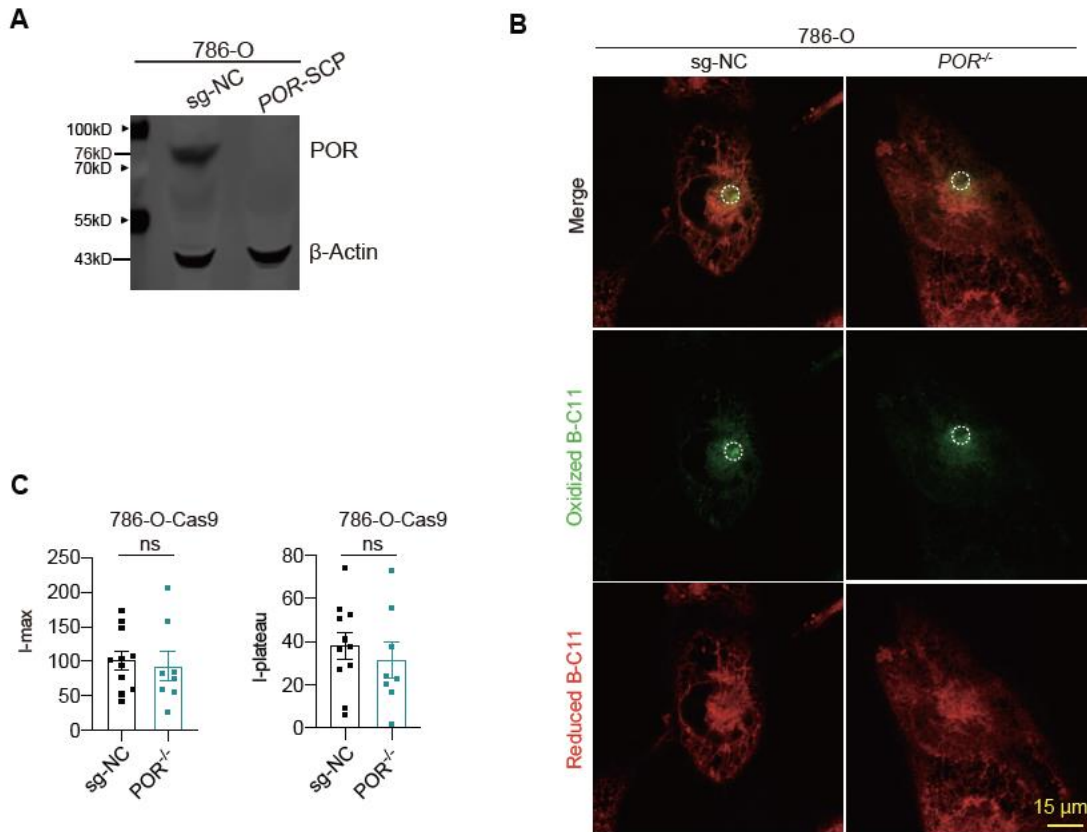

**Supplementary Figure 3. PALPv1-induced fluorescence is likely independent of POR activity (related to Figure 2).**

**A.** Immunoblot analysis of POR protein levels in sgNC-expressing or *POR*<sup>-/-</sup> 786-O cells.  $\beta$ -Actin was used as a loading control. This experiment was performed in duplicate.

**B.** Representative fluorescent images showing the I-max (0 sec) post the application of laser pulses to 786-O cells expressing sg-NC or *POR*<sup>-/-</sup> cells. Green, oxidized BODIPY-C11 signal; red, reduced BODIPY-C11 signal. This experiment was performed twice and 8-10 cells were analyzed for each group in each experiment.

**C.** Box-scatter plots showing the PALP parameters (I-max and I-plateau) of 786-O-Cas9 cells expressing sg-NC or a *POR*<sup>-/-</sup> 786-O single-cell clone. Dots and error bars, mean $\pm$ s.d. Two-tailed, unpaired student's T-test. ns, not significant.

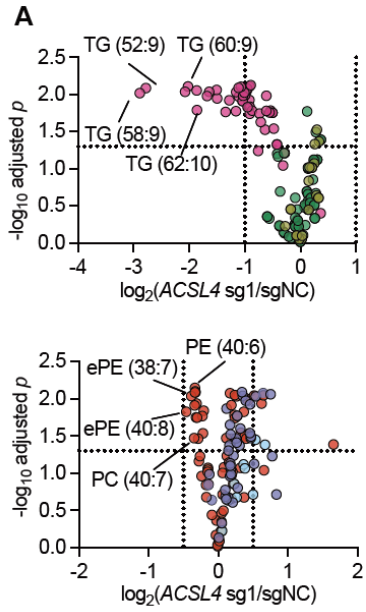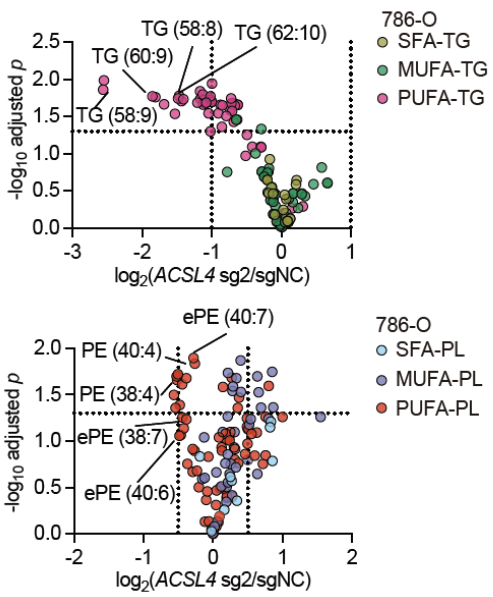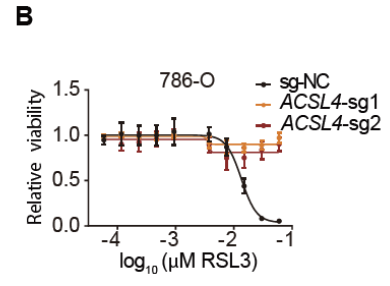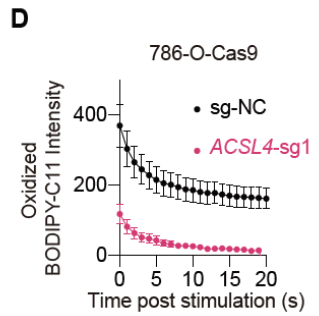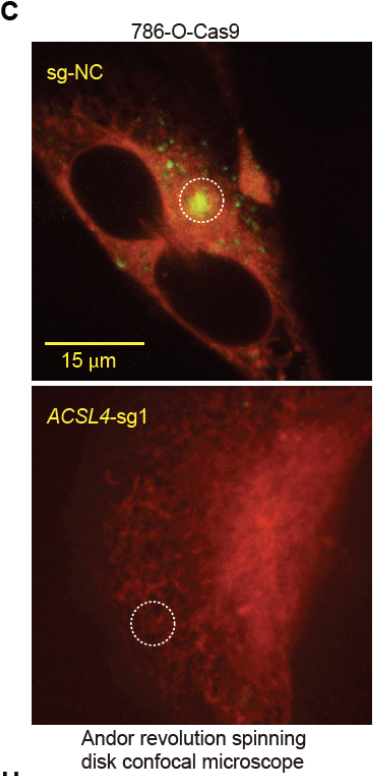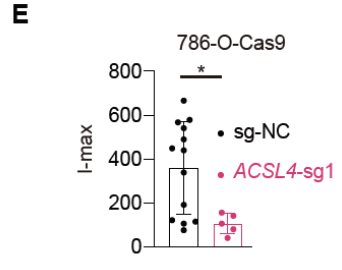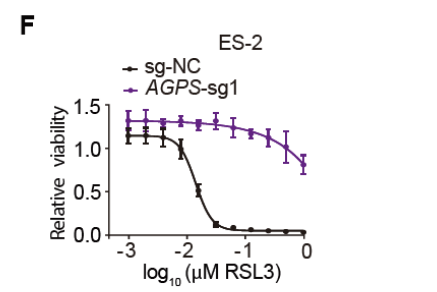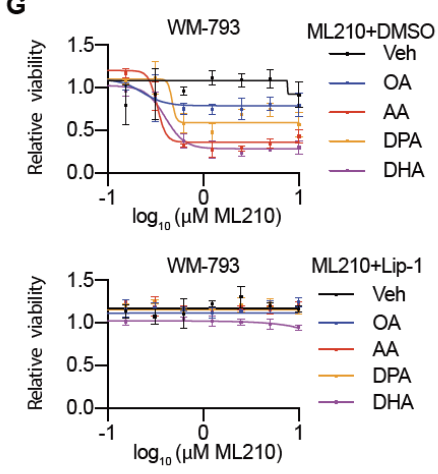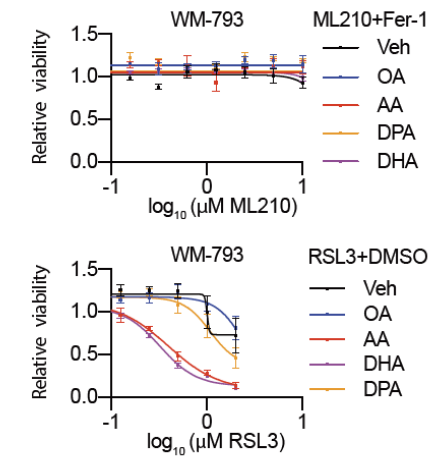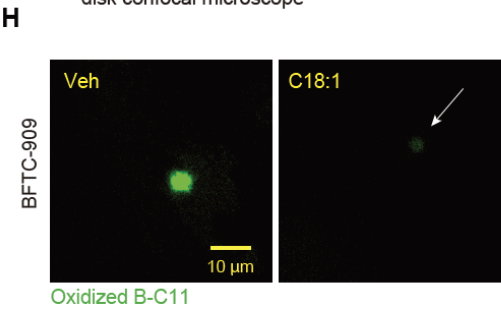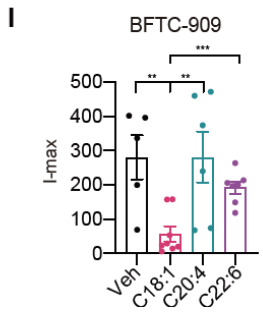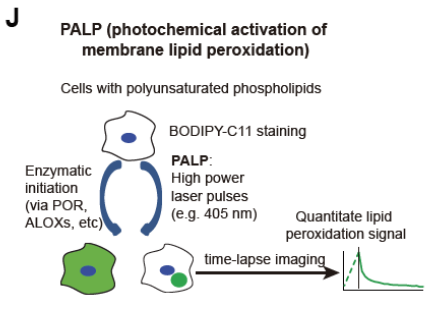

**Supplementary Figure 4. PALPv1-induced fluorescence is dependent on membrane polyunsaturated phospholipid levels (related to Figure 2).**

**A.** Lipidomic analysis of 786-O cells expressing sg-NC or *ACSL4*-targeting sgRNAs. This experiment was performed twice. n=3 for each cell line condition. SFA, MUFA, PUFA, saturated, monounsaturated, or polyunsaturated fatty acids; TG, triacylglycerides; PL, phospholipids. PE, phosphatidylethanolamine; ePE, ether-linked PE; PC, phosphatidylcholine.

**B.** Viability curves of 786-O cells expressing sg-NC or sgRNAs targeting *ACSL4* treated with indicated concentrations of GPX4 inhibitor RSL3 for 48h. n=6; dots and error bars, mean±s.d. This experiment was repeated three times.

**C.** Representative fluorescent images showing the I-max (0 sec) post the application of laser pulses to 786-O cells expressing sg-NC or *ACSL4*-targeting sgRNA acquired on an Andor revolution spinning disk confocal microscope. Green, oxidized BODIPY-C11 signal; red, reduced BODIPY-C11 signal. Scale bar indicates 15 µm.

**D.** Quantifications of the PALP signal intensity from time-lapse imaging of 786-O cells expressing sg-NC or *ACSL4*-targeting sgRNA after laser activation. 5 cells were measured for each condition. Dots and error bars indicate mean±s.d..

**E.** Box-scatter plots showing the PALP I-max of 786-O cells expressing sg-NC or sgRNAs targeting *ACSL4*. Dots and error bars, mean±s.d. Two-tailed unpaired T-test, \*, p<0.05.

**F.** Viability curves of ES-2 cells expressing sg-NC or sgRNAs targeting *AGPS* treated with indicated concentrations of GPX4 inhibitor RSL3 for 48h. n=6; error bar, mean±s.d. This experiment was repeated twice.

**G.** Viability curves for WM-793 cells treated with vehicle or indicated fatty acids, together with DMSO, Lip-1 or Fer-1 and indicated concentrations of ML210 or RSL3 for 48h. n=4; dots and error bars, mean±s.d. This experiment was performed once.

**H.** Box-scatter plots showing the I-max of PALP signals in BFTC-909 urothelial carcinoma cells treated with indicated free fatty acid. Two-tailed unpaired T-test, \*\*, p<0.01, \*\*\*, p<0.001.

**I.** Representative fluorescent images showing the I-max (0 sec) post the application of laser pulses to BFTC-909 cells treated with vehicle or oleic acid (C18:1), arachidonic acid (C20:4) or DHA (C22:6). Green: oxidized BODIPY-C11 signal. Dots and error bars, mean±s.d. This experiment was performed twice.

**J.** Schematic diagram summarising the applications of PALP for detecting polyunsaturated phospholipid levels via photochemically-induced lipid peroxidation in live cells. PUFA, polyunsaturated fatty acyl-.

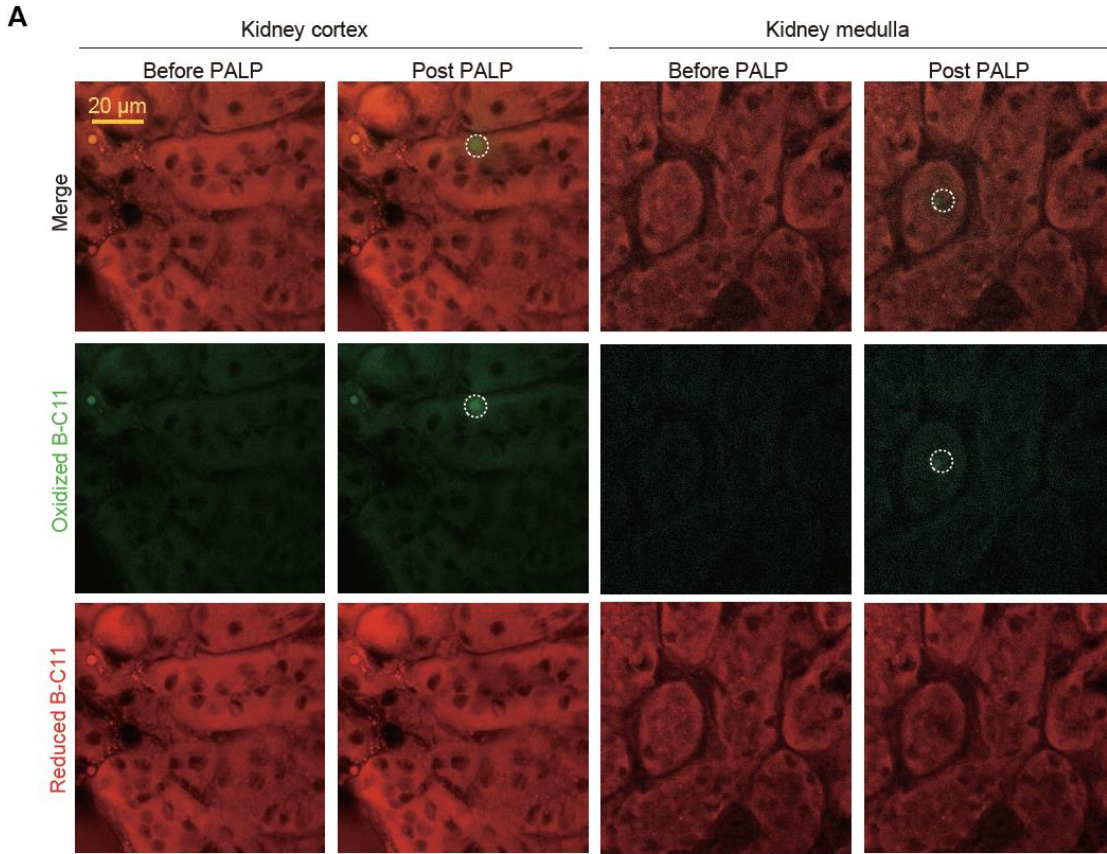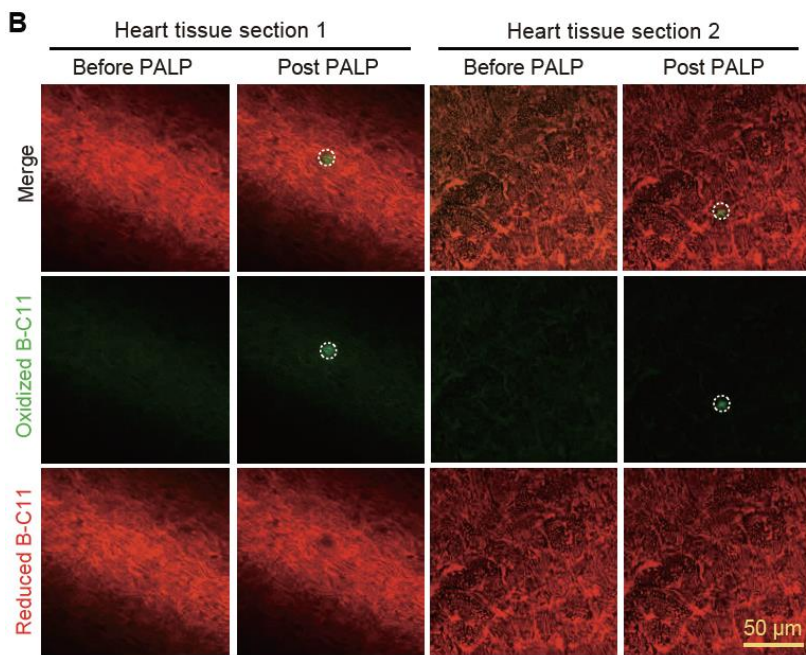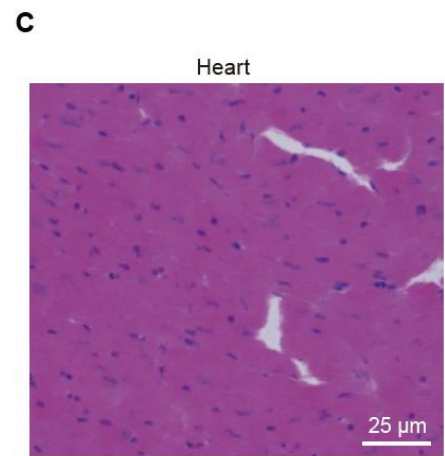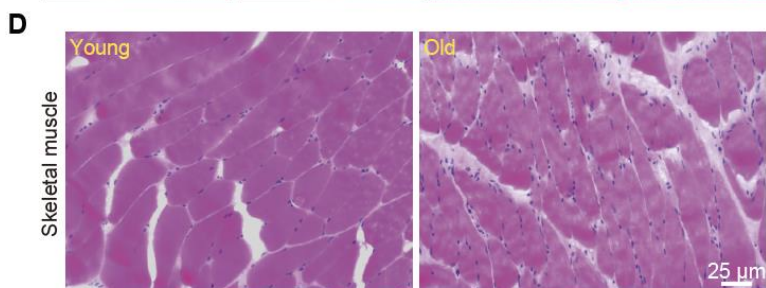



**Supplementary Figure 5. The PALPv1 technique can detect polyunsaturated phospholipids in mouse tissues *in situ* (related to Figure 5).**

**A.** Representative fluorescent images showing PALP-induced fluorescence in cryo-sectioned mouse kidney tissue samples (two additional stimulated regions from the same experiment as **Figure 5C**).

**B.** Representative images showing PALP-induced fluorescence in cryo-sectioned mouse heart tissue samples (two additional regions from the same experiment as **Figure 5D**). Green, oxidized BODIPY-C11 signal; red, reduced BODIPY-C11 signal. Scale bar indicates 10  $\mu\text{m}$ .

**C.** Histologic examination of longitudinal section of mouse heart using hematoxylin and eosin (H&E) staining. Original magnification X 400.

**D.** Histologic examination of longitudinal sections of mouse skeletal muscle using hematoxylin and eosin (H&E) staining from young and old mice. Original magnification X 200.

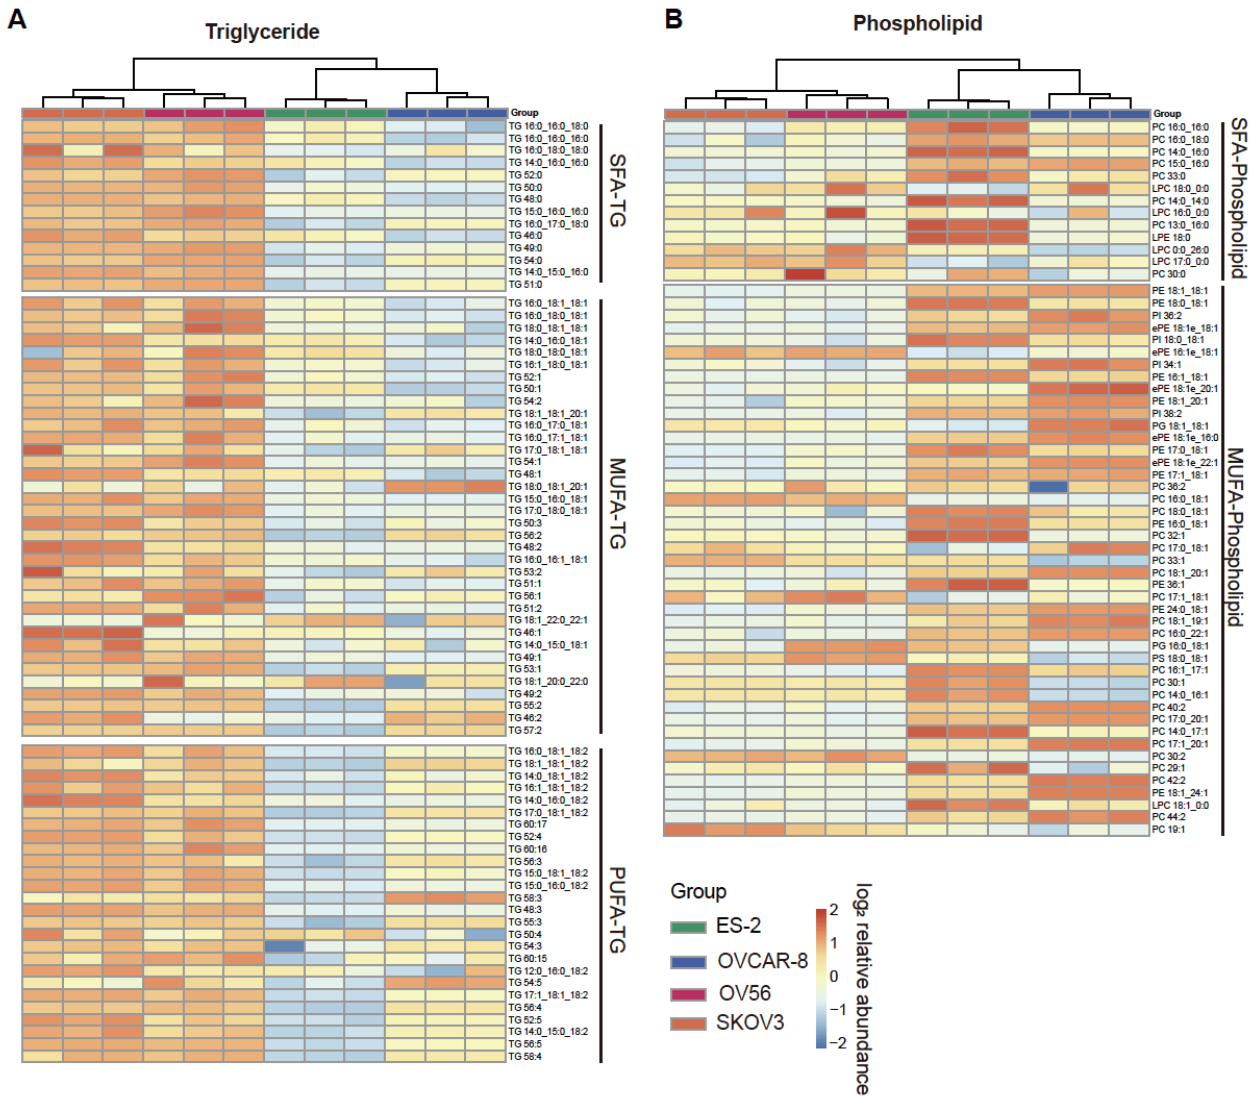

**Supplementary Figure 6. Lipidomics analysis across a collection of ovarian cancer cell lines in culture (related to Figure 6).**

**A.** Heatmap presentation of lipidomic analysis results showing the triacylglyceride (TG) distribution among ES-2, OVCAR-8, OV56, and SKOV3 ovarian cancer cells. Red, high intensity; blue, low intensity. SFA, saturated fatty acyl-; MUFA, monounsaturated fatty acyl-; PUFA, polyunsaturated fatty acyl-. n=3 for each cell line.

**B.** Heatmap presentation of lipidomic analysis results showing the phospholipid distribution among ES-2, OVCAR-8, OV56, and SKOV3 ovarian cancer cells. Red, high intensity; blue, low intensity. n=3 for each cell line.

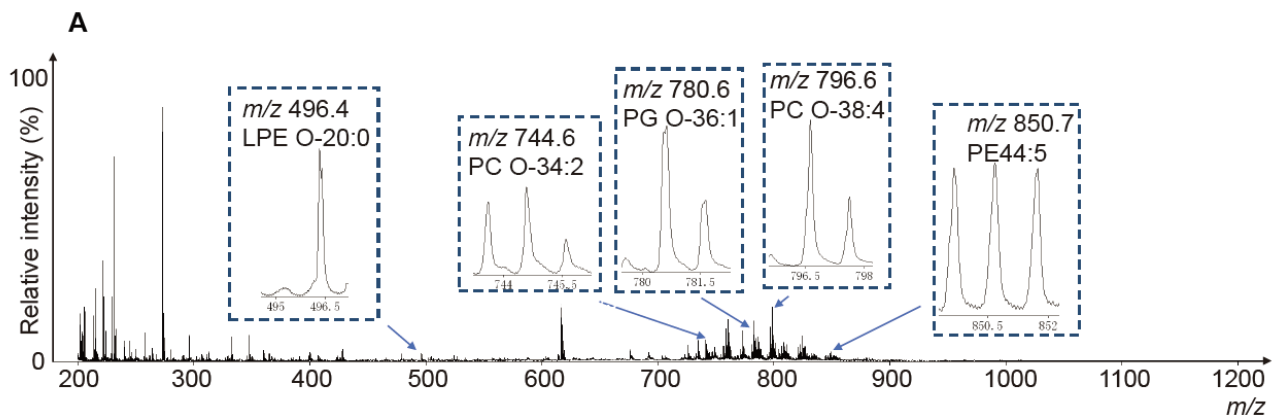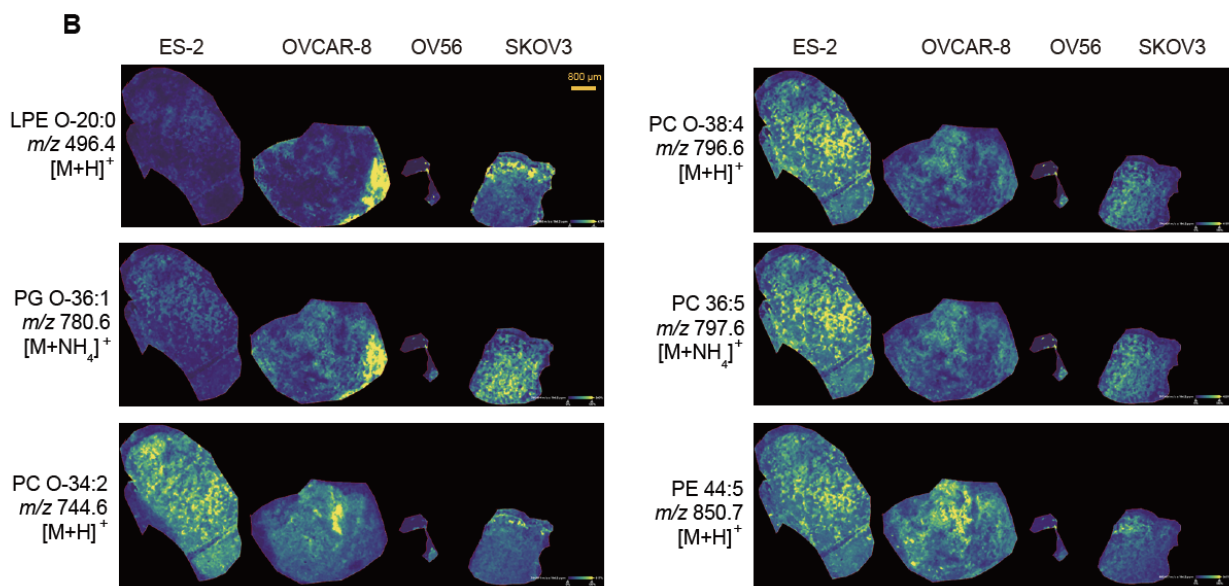

**Supplementary Figure 7. MALDI-TOF mass spectrometry imaging analysis across a collection of ovarian cancer xenograft tumors (related to Figure 7).**

**A.** Histologic examination of xenograft tumor sections using hematoxylin and eosin (H&E) staining across a collection of xenograft tumor sections including human ovarian ES-2, OVCAR-8, OV56, and SKOV3 cells. Original magnification X 200.

**B.** Ion features profiling of xenograft tumor sections showing representative lipid species.

**C.** Mass spectrometry images showing the spatial distribution of representative phospholipid on xenograft tumor sections including human ovarian ES-2, OVCAR-8, OV56, and SKOV3 cells. Yellow, high intensity; Blue, low intensity. Scale bar indicates 800  $\mu\text{m}$ .
